# Supplementary material for: Post-depositional formation of vivianite-type minerals alters sediment phosphorus records
Source: Copernicus journal article supplement (doi:10.5194/bg-15-861-2018), 2018-02-12
Supplement: Supplementary file 1 [file bg-15-861-2018-supplement.zip]

Archive with 3 entries (3 files):
- Supplementary information_rates_pmol_cm3_d.xlsx
- bg-15-861-2018-supplement-title-page.pdf
- Supplementary information.pdf
