# Supplementary material for: Post-depositional formation of vivianite-type minerals alters sediment phosphorus records
Source: Copernicus journal article supplement (doi:10.5194/bg-15-861-2018), 2018-02-12
Supplement: Supplementary file 1 [file bg-15-861-2018-supplement.zip › bg-15-861-2018-supplement-title-page.pdf]

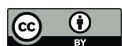

## *Supplement of*

# **Post-depositional formation of vivianite-type minerals alters sediment phosphorus records**

**Nikki Dijkstra et al.**

*Correspondence to:* Caroline P. Slomp ([c.p.slomp@uu.nl](mailto:c.p.slomp@uu.nl))

- [bg-15-861-2018-supplement-title-page.pdf](#)
- [Supplementary information.pdf](#)
- [Supplementary information\\_rates\\_pmol\\_cm3\\_d.xlsx](#)

The copyright of individual parts of the supplement might differ from the CC BY 4.0 License.
