# Supplementary material for: Post-depositional formation of vivianite-type minerals alters sediment phosphorus records
Source: Copernicus journal article supplement (doi:10.5194/bg-15-861-2018), 2018-02-12
Supplement: Supplementary file 1 [file Supplementary information_rates_pmol_cm3_d.xlsx]

## Sheet: rates_summary_pmol_cm3_d
Depth-integrated rates	R1	R2	R3	R4	R5	R6	R7	R8	R9	R10	R11	R12	R13	R14	R15	R16	R17	R18	R19	R20	R21	R22	R23	R24
(pmol/cm2/d)	0	8741	830	51767	86568	0	0	0	0	0	0	8622	2888	13410	2039	466	26209	1158	85	2161	8635	323	385	47
	all rates in pmol/cm3/day with cm3 being the TOTAL volume
Depth (cm)	R1	R2	R3	R4	R5	R6	R7	R8	R9	R10	R11	R12	R13	R14	R15	R16	R17	R18	R19	R20	R21	R22	R23	R24
0.5	0	8619.42	824.64	460.05	57.29	0	0	0	0	0	0	780.14	1.51	0	192.2	1.35	1.84	0	84.77	1.25	0.13	0.01	0	0
1.51	0	97.07	5.22	470.02	59.06	0	0	0	0	0	0	1793.92	11.2	0	442.62	10.83	5.45	0	0.52	0.95	0.35	0.05	0	0
2.55	0	1.02	0.03	467.39	59.29	0	0	0	0	0	0	1961.09	27.08	0	483.19	26.46	9.07	0	0	0.62	0.53	0.11	0	0
3.61	0	0.01	0	464.56	59.51	0	0	0	0	0	0	1550.32	44.94	0	377.96	43.72	12.69	0	0	0.34	0.66	0.18	0	0.01
4.7	0	0	0	461.67	59.74	0	0	0	0	0	0	977.5	61.43	0	231.45	58.73	16.31	0	0	0.16	0.73	0.23	0	0.02
5.81	0	0	0	458.71	59.98	0	0	0	0	0	0	513.04	74.99	0.01	112.6	68.2	19.94	0	0	0.07	0.76	0.27	0	0.03
6.95	0	0	0	455.69	60.23	0	0	0	0	0	0	229.74	85.39	0.02	41.6	66.56	23.57	0	0	0.03	0.76	0.3	0	0.05
8.11	0	0	0	452.6	60.49	0	0	0	0	0	0	89.23	93.02	0.06	11.13	46.07	27.2	0	0	0.01	0.74	0.32	0	0.08
9.31	0	0	0	449.45	60.76	0	0	0	0	0	0	30.43	98.34	0.14	2.47	20.91	30.82	0	0	0	0.71	0.33	0	0.11
10.53	0	0	0	446.23	61.04	0	0	0	0	0	0	9.19	101.69	0.27	0.52	7.2	34.44	0	0	0	0.68	0.33	0	0.14
11.78	0	0	0	442.95	61.33	0	0	0	0	0	0	2.48	103.29	0.43	0.1	2.08	38.06	0	0	0	0.65	0.33	0	0.18
13.06	0	0	0	439.6	61.64	0	0	0	0	0	0	0.6	103.33	0.63	0.02	0.52	41.66	0	0	0	0.61	0.32	0	0.21
14.37	0	0	0	436.18	61.95	0	0	0	0	0	0	0.13	101.96	0.86	0	0.12	45.26	0	0	0	0.57	0.31	0	0.25
15.72	0	0	0	432.68	62.28	0	0	0	0	0	0	0.03	99.36	1.13	0	0.02	48.85	0	0	0	0.53	0.3	0	0.28
17.09	0	0	0	429.12	62.62	0	0	0	0	0	0	0	95.68	1.44	0	0	52.43	0	0	0	0.49	0.29	0	0.31
18.5	0	0	0	425.49	62.97	0	0	0	0	0	0	0	91.1	1.77	0	0	55.99	0	0	0	0.45	0.27	0	0.33
19.94	0	0	0	421.78	63.34	0	0	0	0	0	0	0	85.8	2.14	0	0	59.54	0	0	0	0.41	0.25	0	0.34
21.42	0	0	0	417.99	63.72	0	0	0	0	0	0	0	79.96	2.53	0	0	63.07	0	0	0	0.37	0.23	0	0.35
22.93	0	0	0	414.13	64.11	0	0	0	0	0	0	0	73.75	2.95	0	0	66.58	0	0	0	0.33	0.21	0	0.35
24.48	0	0	0	410.19	64.53	0	0	0	0	0	0	0	67.32	3.39	0	0	70.07	0	0	0	0.3	0.19	0.01	0.34
26.07	0	0	0	406.18	64.95	0	0	0	0	0	0	0	60.82	3.86	0	0	73.53	0	0	0	0.26	0.17	0.01	0.32
27.69	0	0	0	402.08	65.4	0	0	0	0	0	0	0	54.39	4.34	0	0	76.97	0	0	0	0.23	0.15	0.01	0.3
29.35	0	0	0	397.9	65.86	0	0	0	0	0	0	0	48.15	4.83	0	0	80.37	0	0	0	0.2	0.13	0.01	0.28
31.05	0	0	0	393.63	66.34	0	0	0	0	0	0	0	42.18	5.33	0	0	83.75	0	0	0	0.17	0.11	0.01	0.25
32.79	0	0	0	389.29	66.85	0	0	0	0	0	0	0	36.56	5.85	0	0	87.09	0	0	0	0.15	0.09	0.01	0.22
34.58	0	0	0	384.85	67.37	0	0	0	0	0	0	0	31.36	6.37	0	0	90.38	0	0	0	0.12	0.08	0.01	0.19
36.4	0	0	0	380.33	67.91	0	0	0	0	0	0	0	26.62	6.89	0	0	93.64	0	0	0	0.1	0.07	0.01	0.17
38.27	0	0	0	375.72	68.48	0	0	0	0	0	0	0	22.34	7.42	0	0	96.85	0	0	0	0.09	0.06	0.01	0.14
40.19	0	0	0	371.02	69.07	0	0	0	0	0	0	0	18.55	7.95	0	0	100.01	0	0	0	0.07	0.05	0.01	0.12
42.15	0	0	0	366.23	69.69	0	0	0	0	0	0	0	15.23	8.48	0	0	103.12	0	0	0	0.06	0.04	0.01	0.09
44.16	0	0	0	361.35	70.33	0	0	0	0	0	0	0	12.36	9.01	0	0	106.17	0	0	0	0.05	0.03	0.01	0.08
46.21	0	0	0	356.37	71	0	0	0	0	0	0	0	9.91	9.54	0	0	109.15	0	0	0	0.04	0.02	0.01	0.06
48.32	0	0	0	351.3	71.7	0	0	0	0	0	0	0	7.85	10.07	0	0	112.06	0	0	0	0.03	0.02	0.01	0.05
50.47	0	0	0	346.13	72.43	0	0	0	0	0	0	0	6.15	10.59	0	0	114.9	0	0	0	0.02	0.01	0.01	0.04
52.68	0	0	0	340.86	73.19	0	0	0	0	0	0	0	4.76	11.12	0	0	117.66	0	0	0	0.02	0.01	0.02	0.03
54.94	0	0	0	335.49	73.98	0	0	0	0	0	0	0	3.63	11.64	0	0	120.33	0	0	0	0.01	0.01	0.02	0.02
57.25	0	0	0	330.02	74.81	0	0	0	0	0	0	0	2.74	12.16	0	0	122.91	0	0	0	0.01	0.01	0.02	0.01
59.62	0	0	0	324.45	75.68	0	0	0	0	0	0	0	2.04	12.68	0	0	125.39	0	0	0	0.01	0	0.02	0.01
62.04	0	0	0	318.77	76.58	0	0	0	0	0	0	0	1.49	13.2	0	0	127.75	0	0	0	0.01	0	0.02	0.01
64.53	0	0	0	312.99	77.52	0	0	0	0	0	0	0	1.08	13.72	0	0	130	0	0	0	0	0	0.02	0.01
67.07	0	0	0	307.1	78.5	0	0	0	0	0	0	0	0.77	14.23	0	0	132.12	0	0	0	0	0	0.02	0
69.67	0	0	0	301.11	79.53	0	0	0	0	0	0	0	0.54	14.74	0	0	134.11	0	0	0	0	0	0.02	0
72.34	0	0	0	295	80.6	0	0	0	0	0	0	0	0.38	15.24	0	0	135.95	0	0	0	0	0	0.02	0
75.06	0	0	0	288.78	81.72	0	0	0	0	0	0	0	0.26	15.74	0	0	137.63	0	0	0	0	0	0.02	0
77.86	0	0	0	282.46	82.89	0	0	0	0	0	0	0	0.17	16.22	0	0	139.15	0	0	0	0	0	0.03	0
80.72	0	0	0	276.02	84.1	0	0	0	0	0	0	0	0.11	16.7	0	0	140.49	0	0	0	0	0	0.03	0
83.65	0	0	0	269.46	85.37	0	0	0	0	0	0	0	0.07	17.16	0	0	141.64	0	0	0	0	0	0.03	0
86.65	0	0	0	262.8	86.69	0	0	0	0	0	0	0	0.05	17.6	0	0	142.59	0	0	0	0	0	0.03	0
89.72	0	0	0	256.02	88.07	0	0	0	0	0	0	0	0.03	18.03	0	0	143.33	0	0	0	0	0	0.03	0
92.86	0	0	0	249.12	89.5	0	0	0	0	0	0	0	0.02	18.43	0	0	143.84	0	0	0	0	0	0.03	0
96.08	0	0	0	242.12	90.99	0	0	0	0	0	0	0	0.01	18.82	0	0	144.12	0	0	0	0	0	0.03	0
99.38	0	0	0	235	92.54	0	0	0	0	0	0	0	0.01	19.17	0	0	144.15	0	0	0	0	0	0.04	0
102.75	0	0	0	227.77	94.15	0	0	0	0	0	0	0	0	19.5	0	0	143.93	0	0	0	0	0	0.04	0
106.21	0	0	0	220.43	95.81	0	0	0	0	0	0	0	0	19.8	0	0	143.44	0	0	0	0	0	0.04	0
109.75	0	0	0	212.98	97.53	0	0	0	0	0	0	0	0	20.07	0	0	142.68	0	0	0	0	0	0.04	0
113.37	0	0	0	205.43	99.31	0	0	0	0	0	0	0	0	20.32	0	0	141.63	0	0	0	0	0	0.04	0
117.08	0	0	0	197.78	101.13	0	0	0	0	0	0	0	0	20.53	0	0	140.28	0	0	0	0	0	0.04	0
120.88	0	0	0	190.05	103.01	0	0	0	0	0	0	0	0	20.71	0	0	138.65	0	0	0	0	0	0.04	0
124.76	0	0	0	182.22	104.94	0	0	0	0	0	0	0	0	20.86	0	0	136.71	0	0	0	0	0	0.05	0
128.75	0	0	0	174.32	106.9	0	0	0	0	0	0	0	0	20.97	0	0	134.47	0	0	0	0	0	0.05	0
132.82	0	0	0	166.35	108.89	0	0	0	0	0	0	0	0	21.05	0	0	131.92	0	0	0	0	0	0.05	0
137	0	0	0	158.33	110.9	0	0	0	0	0	0	0	0	21.09	0	0	129.08	0	0	0	0	0	0.05	0
141.27	0	0	0	150.27	112.93	0	0	0	0	0	0	0	0	21.09	0	0	125.95	0	0	0	0	0	0.05	0
145.65	0	0	0	142.19	114.95	0	0	0	0	0	0	0	0	21.04	0	0	122.54	0	0	0	0	0	0.06	0
150.13	0	0	0	134.1	116.96	0	0	0	0	0	0	0	0	20.95	0	0	118.85	0	0	0	0	0	0.06	0
154.72	0	0	0	126.03	118.93	0	0	0	0	0	0	0	0	20.81	0	0	114.9	0	0	0	0	0	0.06	0
159.41	0	0	0	118.01	120.85	0	0	0	0	0	0	0	0	20.62	0	0	110.72	0	0	0	0	0	0.06	0
164.22	0	0	0	110.06	122.7	0	0	0	0	0	0	0	0	20.39	0	0	106.32	0	0	0	0	0	0.07	0
169.15	0	0	0	102.22	124.47	0	0	0	0	0	0	0	0	20.12	0	0	101.72	0	0	0	0	0	0.07	0
174.19	0	0	0	94.52	126.14	0	0	0	0	0	0	0	0	19.82	0	0	96.95	0	0	0	0	0	0.08	0
179.35	0	0	0	87.01	127.7	0	0	0	0	0	0	0	0	19.52	0	0	92.05	0	0	0	0	0	0.09	0
184.64	0	0	0	79.73	129.15	0	0	0	0	0	0	0	0	19.22	0	0	87.03	0	0	0	0	0	0.1	0
190.05	0	0	0	72.72	130.51	0	0	0	0	0	0	0	0	18.94	0	0	81.94	0	0	0	0	0	0.12	0
195.59	0	0	0	66.03	131.79	0	0	0	0	0	0	0	0	18.7	0	0	76.8	0	0	0	0	0	0.14	0
201.27	0	0	0	59.67	133.01	0	0	0	0	0	0	0	0	18.51	0	0	71.66	0	0	0	0	0	0.16	0
207.08	0	0	0	53.69	134.21	0	0	0	0	0	0	0	0	18.37	0	0	66.54	0	0	0	0	0	0.2	0
213.03	0	0	0	48.1	135.4	0	0	0	0	0	0	0	0	18.27	0	0	61.48	0	0	0	0	0	0.24	0
219.12	0	0	0	42.89	136.6	0	0	0	0	0	0	0	0	18.2	0	0	56.52	0	0	0	0	0	0.29	0
225.36	0	0	0	38.06	137.79	0	0	0	0	0	0	0	0	18.14	0	0	51.68	0	0	0	0	0	0.35	0
231.74	0	0	0	33.61	138.94	0	0	0	0	0	0	0	0	18.1	0	0	47	0	0	0	0	0	0.42	0
238.28	0	0	0	29.51	140.01	0	0	0	0	0	0	0	0	18.06	0	0	42.5	0	0	0	0	0	0.52	0
244.97	0	0	0	25.75	140.92	0	0	0	0	0	0	0	0	18.05	0	0	38.21	0	0	0	0	0	0.62	0
251.83	0	0	0	22.31	141.6	0	0	0	0	0	0	0	0	18.11	0	0	34.15	0	0	0	0	0	0.75	0
258.85	0	0	0	19.19	142	0	0	0	0	0	0	0	0	18.29	0	0	30.33	0	0	0	0	0	0.89	0
266.03	0	0	0	16.38	142.07	0	0	0	0	0	0	0	0	18.66	0	0	26.77	0	0	0	0	0	1.05	0
273.39	0	0	0	13.87	141.82	0	0	0	0	0	0	0	0	19.31	0	0	23.47	0	0	0	0	0	1.21	0
280.92	0	0	0	11.65	141.28	0	0	0	0	0	0	0	0	20.29	0	0	20.45	0	0	0	0	0	1.38	0
288.64	0	0	0	9.71	140.5	0	0	0	0	0	0	0	0	21.64	0	0	17.69	0	0	0	0	0	1.53	0
296.54	0	0	0	8.04	139.56	0	0	0	0	0	0	0	0	23.38	0	0	15.19	0	0	0	0	0	1.67	0
304.62	0	0	0	6.61	138.53	0	0	0	0	0	0	0	0	25.46	0	0	12.96	0	0	0	0	0	1.78	0
312.9	0	0	0	5.39	137.48	0	0	0	0	0	0	0	0	27.78	0	0	10.97	0	0	0	0	0	1.86	0
321.38	0	0	0	4.37	136.46	0	0	0	0	0	0	0	0	30.22	0	0	9.22	0	0	0	0	0	1.9	0
330.06	0	0	0	3.52	135.47	0	0	0	0	0	0	0	0	32.6	0	0	7.69	0	0	0	0	0	1.91	0
338.95	0	0	0	2.82	134.51	0	0	0	0	0	0	0	0	34.76	0	0	6.36	0	0	0	0	0	1.88	0
348.05	0	0	0	2.24	133.56	0	0	0	0	0	0	0	0	36.53	0	0	5.22	0	0	0	0	0	1.82	0
357.37	0	0	0	1.76	132.59	0	0	0	0	0	0	0	0	37.79	0	0	4.24	0	0	0	0	0	1.73	0
366.91	0	0	0	1.38	131.55	0	0	0	0	0	0	0	0	38.46	0	0	3.42	0	0	0	0	0	1.63	0
376.68	0	0	0	1.07	130.42	0	0	0	0	0	0	0	0	38.53	0	0	2.74	0	0	0	0	0	1.51	0
386.68	0	0	0	0.82	129.17	0	0	0	0	0	0	0	0	38.01	0	0	2.17	0	0	0	0	0	1.39	0
396.92	0	0	0	0.62	127.76	0	0	0	0	0	0	0	0	36.96	0	0	1.7	0	0	0	0	0	1.27	0
407.4	0	0	0	0.47	126.19	0	0	0	0	0	0	0	0	35.49	0	0	1.33	0	0	0	0	0	1.15	0
418.14	0	0	0	0.35	124.41	0	0	0	0	0	0	0	0	33.69	0	0	1.02	0	0	0	0	0	1.04	0
429.13	0	0	0	0.26	122.42	0	0	0	0	0	0	0	0	31.67	0	0	0.78	0	0	0	0	0	0.93	0
440.39	0	0	0	0.19	120.17	0	0	0	0	0	0	0	0	29.53	0	0	0.59	0	0	0	0	0	0.84	0
451.91	0	0	0	0.14	117.65	0	0	0	0	0	0	0	0	27.36	0	0	0.44	0	0	0	0	0	0.75	0
463.71	0	0	0	0.1	114.85	0	0	0	0	0	0	0	0	25.22	0	0	0.33	0	0	0	0	0	0.67	0
475.8	0	0	0	0.07	111.77	0	0	0	0	0	0	0	0	23.17	0	0	0.24	0	0	0	0	0	0.6	0
488.17	0	0	0	0.05	108.42	0	0	0	0	0	0	0	0	21.23	0	0	0.18	0	0	0	0	0	0.54	0
500.83	0	0	0	0.03	104.82	0	0	0	0	0	0	0	0	19.42	0	0	0.13	0	0	0	0	0	0.48	0
513.8	0	0	0	0.02	101.02	0	0	0	0	0	0	0	0	17.74	0	0	0.09	0	0	0	0	0	0.42	0
527.08	0	0	0	0.01	97.08	0	0	0	0	0	0	0	0	16.17	0	0	0.06	0	0	0	0	0	0.37	0
540.68	0	0	0	0.01	93.04	0	0	0	0	0	0	0	0	14.71	0	0	0.04	0	0	0	0	0	0.32	0
554.43	0	0	0	0.01	89.06	0	0	0	0	0	0	0	0	13.35	0	0	0.03	0	0	0	0	0	0.28	0
568.03	0	0	0	0	85.27	0	0	0	0	0	0	0	0	12.1	0	0	0.02	0	0	0	0	0	0.24	0
581.32	0	0	0	0	81.69	0	0	0	0	0	0	0	0	10.95	0	0	0.01	0	0	0	0	0	0.21	0
594.29	0	0	0	0	78.31	0	0	0	0	0	0	0	0	9.89	0	0	0.01	0	0	0	0	0	0.18	0
606.97	0	0	0	0	75.14	0	0	0	0	0	0	0	0	8.91	0	0	0.01	0	0	0	0	0	0.15	0
619.35	0	0	0	0	72.17	0	0	0	0	0	0	0	0	7.99	0	0	0.01	0	0	0	0	0	0.13	0
631.45	0	0	0	0	69.39	0	0	0	0	0	0	0	0	7.14	0	0	0	0	0	0	0	0	0.11	0
643.27	0	0	0	0	66.78	0	0	0	0	0	0	0	0	6.35	0	0	0	0	0	0	0	0	0.09	0
654.81	0	0	0	0	64.32	0	0	0	0	0	0	0	0	5.62	0	0	0	0	0	0	0	0	0.07	0
666.09	0	0	0	0	62.01	0	0	0	0	0	0	0	0	4.95	0	0	0	0	0	0	0	0	0.06	0
677.1	0	0	0	0	59.83	0	0	0	0	0	0	0	0	4.35	0	0	0	0	0	0	0	0	0.05	0
687.86	0	0	0	0	57.77	0	0	0	0	0	0	0	0	3.8	0	0	0	0	0	0	0	0	0.04	0
698.37	0	0	0	0	55.81	0	0	0	0	0	0	0	0	3.31	0	0	0	0	0	0	0	0	0.04	0
708.64	0	0	0	0	53.96	0	0	0	0	0	0	0	0	2.87	0	0	0	0	0	0	0	0	0.03	0
718.67	0	0	0	0	52.2	0	0	0	0	0	0	0	0	2.48	0	0	0	0	0	0	0	0	0.02	0
728.47	0	0	0	0	50.53	0	0	0	0	0	0	0	0	2.13	0	0	0	0	0	0	0	0	0.02	0
738.04	0	0	0	0	48.94	0	0	0	0	0	0	0	0	1.84	0	0	0	0	0	0	0	0	0.02	0
747.4	0	0	0	0	47.42	0	0	0	0	0	0	0	0	1.58	0	0	0	0	0	0	0	0	0.02	0
756.53	0	0	0	0	45.97	0	0	0	0	0	0	0	0.01	1.36	0	0	0	0	0	0	0	0	0.01	0
765.45	0	0	0	0	44.59	0	0	0	0	0	0	0	0.01	1.17	0	0	0	0	0	0	0	0	0.01	0
774.17	0	0	0	0	43.28	0	0	0	0	0	0	0	0.01	1.01	0	0	0	0	0	0	0	0	0.01	0
782.68	0	0	0	0	42.02	0	0	0	0	0	0	0	0.01	0.88	0	0	0	0	0	0	0	0	0.01	0
791	0	0	0	0	40.82	0	0	0	0	0	0	0	0.02	0.78	0	0	0	0	0	0	0	0	0.01	0
799.13	0	0	0	0	39.68	0	0	0	0	0	0	0	0.03	0.69	0	0	0	0	0	0	0	0	0.01	0
807.07	0	0	0	0	38.58	0	0	0	0	0	0	0	0.03	0.62	0	0	0	0	0	0	0.01	0	0.01	0
814.82	0	0	0	0	37.54	0	0	0	0	0	0	0	0.04	0.57	0	0	0	0	0	0	0.01	0.01	0.01	0
822.39	0	0	0	0	36.54	0	0	0	0	0	0	0	0.05	0.52	0	0	0	0	0	0	0.01	0.01	0.01	0.01
829.79	0	0	0	0	35.58	0	0	0	0	0	0	0	0.06	0.49	0	0	0	0	0	0	0.01	0.01	0.01	0.01
837.02	0	0	0	0	34.67	0	0	0	0	0	0	0	0.08	0.47	0	0	0	0	0	0	0.02	0.01	0.02	0.01
844.08	0	0	0	0	33.79	0	0	0	0	0	0	0	0.1	0.46	0	0	0	0	0	0	0.02	0.01	0.02	0.01
850.98	0	0	0	0	32.95	0	0	0	0	0	0	0	0.12	0.45	0	0	0	0	0	0	0.03	0.02	0.02	0.02
857.72	0	0	0	0	32.14	0	0	0	0	0	0	0	0.14	0.44	0	0	0	0	0	0	0.03	0.02	0.02	0.02
864.3	0	0	0	0	31.37	0	0	0	0	0	0	0	0.16	0.44	0	0	0	0	0	0	0.04	0.02	0.02	0.02
870.73	0	0	0	0	30.63	0	0	0	0	0	0	0	0.19	0.45	0	0	0	0	0	0	0.05	0.03	0.02	0.03
877.01	0	0	0	0	29.91	0	0	0	0	0	0	0	0.22	0.45	0	0	0	0	0	0	0.06	0.04	0.02	0.03
883.15	0	0	0	0	29.23	0	0	0	0	0	0	0	0.25	0.45	0	0	0	0	0	0	0.08	0.04	0.03	0.04
889.14	0	0	0	0	28.57	0	0	0	0	0	0	0	0.28	0.46	0	0	0	0	0	0	0.09	0.05	0.03	0.05
895	0	0	0	0	27.94	0	0	0	0	0	0	0	0.32	0.46	0	0	0	0	0	0	0.11	0.06	0.03	0.05
900.72	0	0	0	0	27.33	0	0	0	0	0	0	0	0.35	0.47	0	0	0	0	0	0	0.13	0.07	0.03	0.06
906.3	0	0	0	0	26.74	0	0	0	0	0	0	0	0.39	0.47	0	0	0	0	0	0	0.15	0.08	0.03	0.07
911.76	0	0	0	0	26.18	0	0	0	0	0	0	0	0.43	0.47	0	0	0	0	0	0	0.17	0.09	0.03	0.08
917.09	0	0	0	0	25.64	0	0	0	0	0	0	0	0.47	0.47	0	0	0	0	0	0	0.2	0.1	0.03	0.09
922.3	0	0	0	0	25.12	0	0	0	0	0	0	0	0.51	0.47	0	0	0	0	0	0	0.23	0.11	0.03	0.11
927.39	0	0	0	0	24.62	0	0	0	0	0	0	0	0.55	0.47	0	0	0	0	0	0	0.27	0.13	0.04	0.12
932.36	0	0	0	0	24.14	0	0	0	0	0	0	0	0.59	0.46	0	0	0	0	0	0	0.3	0.14	0.04	0.13
937.21	0	0	0	0	23.68	0	0	0	0	0	0	0	0.62	0.46	0	0	0	0	0	0	0.34	0.16	0.04	0.15
941.96	0	0	0	0	23.23	0	0	0	0	0	0	0	0.66	0.45	0	0	0	0	0	0	0.38	0.18	0.04	0.16
946.59	0	0	0	0	22.81	0	0	0	0	0	0	0	0.69	0.44	0	0	0	0	0	0	0.43	0.2	0.04	0.18
951.12	0	0	0	0	22.4	0	0	0	0	0	0	0	0.72	0.43	0	0	0	0	0	0	0.48	0.21	0.04	0.19
955.54	0	0	0	0	22	0	0	0	0	0	0	0	0.75	0.42	0	0	0	0	0	0	0.53	0.23	0.04	0.21
959.86	0	0	0	0	21.63	0	0	0	0	0	0	0	0.77	0.41	0	0	0	0	0	0	0.59	0.25	0.03	0.22
964.08	0	0	0	0	21.27	0	0	0	0	0	0	0	0.79	0.39	0	0	0	0	0	0	0.65	0.28	0.03	0.24
968.2	0	0	0	0	20.92	0	0	0	0	0	0	0	0.81	0.38	0	0	0	0	0	0	0.72	0.3	0.03	0.25
972.22	0	0	0	0	20.58	0	0	0	0	0	0	0	0.82	0.36	0	0	0	0	0	0	0.78	0.32	0.03	0.27
976.16	0	0	0	0	20.26	0	0	0	0	0	0	0	0.83	0.34	0	0	0	0	0	0	0.85	0.34	0.03	0.28
980	0	0	0	0	19.96	0	0	0	0	0	0	0	0.83	0.33	0	0	0	0	0	0	0.93	0.36	0.03	0.29
983.75	0	0	0	0	19.66	0	0	0	0	0	0	0	0.84	0.31	0	0	0	0	0	0	1	0.39	0.03	0.31
987.42	0	0	0	0	19.38	0	0	0	0	0	0	0	0.83	0.29	0	0	0	0	0	0	1.08	0.41	0.03	0.32
991	0	0	0	0	19.11	0	0	0	0	0	0	0	0.83	0.27	0	0	0	0	0	0	1.17	0.43	0.03	0.33
994.5	0	0	0	0	18.84	0	0	0	0	0	0	0	0.82	0.26	0	0	0	0	0	0	1.25	0.46	0.03	0.33
997.92	0	0	0	0	18.59	0	0	0	0	0	0	0	0.8	0.24	0	0	0	0	0	0	1.34	0.48	0.03	0.34
1001.25	0	0	0	0	18.35	0	0	0	0	0	0	0.01	0.79	0.22	0	0.01	0	0	0	0	1.43	0.51	0.02	0.34
1004.52	0	0	0	0	18.12	0	0	0	0	0	0	0.01	0.77	0.2	0	0.01	0	0	0	0	1.53	0.53	0.02	0.34
1007.7	0	0	0	0	17.89	0	0	0	0	0	0	0.02	0.75	0.19	0	0.02	0	0	0	0	1.62	0.55	0.02	0.34
1010.81	0	0	0	0	17.68	0	0	0	0	0	0	0.04	0.72	0.17	0	0.03	0	0	0	0	1.72	0.57	0.02	0.34
1013.85	0	0	0	0	17.47	0	0	0	0	0	0	0.06	0.7	0.16	0	0.06	0	0	0	0	1.82	0.6	0.02	0.34
1016.82	0	0	0	0	17.27	0	0	0	0	0	0	0.09	0.67	0.14	0	0.09	0	0	0	0	1.92	0.62	0.02	0.33
1019.73	0	0	0	0	17.08	0	0	0	0	0	0	0.13	0.64	0.13	0	0.13	0	0	0	0	2.03	0.64	0.02	0.32
1022.56	0	0	0	0	16.89	0	0	0	0	0	0	0.19	0.61	0.12	0	0.18	0	0	0	0	2.13	0.66	0.02	0.32
1025.33	0	0	0	0	16.71	0	0	0	0	0	0	0.26	0.58	0.1	0	0.26	0	0	0	0	2.24	0.68	0.01	0.3
1028.03	0	0	0	0	16.53	0	0	0	0	0	0	0.35	0.54	0.09	0	0.34	0	0	0	0	2.35	0.7	0.01	0.29
1030.67	0	0	0	0	16.37	0	0	0	0	0	0	0.45	0.51	0.08	0	0.45	0	0	0	0.01	2.45	0.72	0.01	0.28
1033.25	0	0	0	0	16.2	0	0	0	0	0	0	0.57	0.47	0.07	0	0.57	0	0.01	0	0.01	2.56	0.74	0.01	0.26
1035.78	0	0	0	0	16.04	0	0	0	0	0	0	0.71	0.43	0.06	0	0.7	0	0.01	0	0.01	2.67	0.76	0.01	0.24
1038.24	0	0	0	0	15.89	0	0	0	0	0	0	0.85	0.4	0.05	0	0.84	0	0.01	0	0.01	2.78	0.77	0.01	0.23
1040.64	0	0	0	0	15.74	0	0	0	0	0	0	0.99	0.36	0.05	0	0.98	0	0.02	0	0.02	2.89	0.79	0.01	0.21
1042.99	0	0	0	0	15.6	0	0	0	0	0	0	1.12	0.33	0.04	0	1.11	0	0.02	0	0.02	2.99	0.8	0.01	0.19
1045.29	0	0	0	0	15.46	0	0	0	0	0	0	1.25	0.3	0.03	0	1.24	0	0.03	0	0.03	3.1	0.82	0.01	0.17
1047.53	0	0	0	0	15.33	0	0	0	0	0	0	1.35	0.26	0.03	0	1.34	0	0.04	0	0.04	3.21	0.83	0.01	0.16
1049.72	0	0	0	0	15.19	0	0	0	0	0	0	1.43	0.23	0.02	0	1.42	0	0.05	0	0.05	3.31	0.85	0	0.14
1051.86	0	0	0	0	15.07	0	0	0	0	0	0	1.49	0.21	0.02	0	1.47	0	0.06	0	0.06	3.41	0.86	0	0.12
1053.95	0	0	0	0	14.94	0	0	0	0	0	0	1.52	0.18	0.02	0	1.5	0	0.07	0	0.07	3.51	0.87	0	0.11
1056	0	0	0	0	14.82	0	0	0	0	0	0	1.51	0.16	0.01	0	1.5	0	0.08	0	0.08	3.61	0.88	0	0.1
1057.99	0	0	0	0	14.7	0	0	0	0	0	0	1.49	0.14	0.01	0	1.47	0	0.09	0	0.1	3.71	0.89	0	0.08
1059.94	0	0	0	0	14.59	0	0	0	0	0	0	1.44	0.12	0.01	0	1.42	0	0.11	0	0.11	3.81	0.9	0	0.07
1061.84	0	0	0	0	14.48	0	0	0	0	0	0	1.37	0.1	0.01	0	1.35	0	0.12	0	0.13	3.9	0.9	0	0.06
1063.7	0	0	0	0	14.37	0	0	0	0	0	0	1.28	0.08	0.01	0	1.27	0	0.14	0	0.15	4	0.91	0	0.05
1065.52	0	0	0	0	14.26	0	0	0	0	0	0	1.19	0.07	0.01	0	1.18	0	0.16	0	0.17	4.09	0.92	0	0.04
1067.29	0	0	0	0	14.16	0	0	0	0	0	0	1.09	0.06	0	0	1.08	0	0.17	0	0.19	4.18	0.93	0	0.04
1069.03	0	0	0	0	14.06	0	0	0	0	0	0	0.99	0.05	0	0	0.98	0	0.19	0	0.21	4.27	0.93	0	0.03
1070.72	0	0	0	0	13.96	0	0	0	0	0	0	0.89	0.04	0	0	0.88	0	0.21	0	0.23	4.36	0.94	0	0.03
1072.38	0	0	0	0	13.87	0	0	0	0	0	0	0.79	0.04	0	0	0.78	0	0.23	0	0.25	4.45	0.94	0	0.02
1073.99	0	0	0	0	13.77	0	0	0	0	0	0	0.7	0.03	0	0	0.69	0	0.25	0	0.27	4.53	0.95	0	0.02
1075.57	0	0	0	0	13.68	0	0	0	0	0	0	0.62	0.02	0	0	0.61	0	0.27	0	0.29	4.62	0.95	0	0.02
1077.11	0	0	0	0	13.59	0	0	0	0	0	0	0.54	0.02	0	0	0.53	0	0.29	0	0.31	4.7	0.96	0	0.01
1078.62	0	0	0	0	13.51	0	0	0	0	0	0	0.47	0.02	0	0	0.46	0	0.31	0	0.33	4.79	0.96	0	0.01
1080.09	0	0	0	0	13.42	0	0	0	0	0	0	0.4	0.01	0	0	0.4	0	0.33	0	0.36	4.87	0.96	0	0.01
1081.53	0	0	0	0	13.34	0	0	0	0	0	0	0.35	0.01	0	0	0.34	0	0.35	0	0.38	4.95	0.97	0	0.01
1082.93	0	0	0	0	13.26	0	0	0	0	0	0	0.3	0.01	0	0	0.3	0	0.36	0	0.4	5.03	0.97	0	0.01
1084.3	0	0	0	0	13.18	0	0	0	0	0	0	0.26	0.01	0	0	0.25	0	0.38	0	0.42	5.11	0.97	0	0
1085.64	0	0	0	0	13.1	0	0	0	0	0	0	0.22	0.01	0	0	0.22	0	0.4	0	0.44	5.19	0.98	0	0
1086.95	0	0	0	0	13.02	0	0	0	0	0	0	0.19	0.01	0	0	0.18	0	0.42	0	0.47	5.26	0.98	0	0
1088.23	0	0	0	0	12.95	0	0	0	0	0	0	0.16	0	0	0	0.16	0	0.44	0	0.49	5.34	0.98	0	0
1089.48	0	0	0	0	12.88	0	0	0	0	0	0	0.13	0	0	0	0.13	0	0.46	0	0.51	5.41	0.98	0	0
1090.7	0	0	0	0	12.8	0	0	0	0	0	0	0.11	0	0	0	0.11	0	0.48	0	0.53	5.48	0.99	0	0
1091.89	0	0	0	0	12.73	0	0	0	0	0	0	0.1	0	0	0	0.1	0	0.5	0	0.55	5.55	0.99	0	0
1093.06	0	0	0	0	12.67	0	0	0	0	0	0	0.08	0	0	0	0.08	0	0.52	0	0.57	5.62	0.99	0	0
1094.2	0	0	0	0	12.6	0	0	0	0	0	0	0.07	0	0	0	0.07	0	0.54	0	0.6	5.69	0.99	0	0
1095.31	0	0	0	0	12.53	0	0	0	0	0	0	0.06	0	0	0	0.06	0	0.56	0	0.62	5.76	0.99	0	0
1096.39	0	0	0	0	12.47	0	0	0	0	0	0	0.05	0	0	0	0.05	0	0.58	0	0.64	5.83	0.99	0	0
1097.45	0	0	0	0	12.41	0	0	0	0	0	0	0.04	0	0	0	0.04	0	0.59	0	0.66	5.89	0.99	0	0
1098.49	0	0	0	0	12.35	0	0	0	0	0	0	0.04	0	0	0	0.04	0	0.61	0	0.68	5.96	1	0	0
1099.5	0	0	0	0	12.29	0	0	0	0	0	0	0.03	0	0	0	0.03	0	0.63	0	0.7	6.02	1	0	0
1100.54	0	0	0	0	12.22	0	0	0	0	0	0	0.03	0	0	0	0.03	0	0.65	0	0.72	6.09	1	0	0
1101.63	0	0	0	0	12.16	0	0	0	0	0	0	0.02	0	0	0	0.02	0	0.67	0	0.74	6.16	1	0	0
1102.77	0	0	0	0	12.09	0	0	0	0	0	0	0.02	0	0	0	0.02	0	0.69	0	0.77	6.23	1	0	0
1103.96	0	0	0	0	12.01	0	0	0	0	0	0	0.01	0	0	0	0.01	0	0.71	0	0.79	6.3	1	0	0
1105.19	0	0	0	0	11.94	0	0	0	0	0	0	0.01	0	0	0	0.01	0	0.73	0	0.82	6.38	1	0	0
1106.47	0	0	0	0	11.86	0	0	0	0	0	0	0.01	0	0	0	0.01	0	0.76	0	0.85	6.46	1	0	0
1107.8	0	0	0	0	11.78	0	0	0	0	0	0	0.01	0	0	0	0.01	0	0.79	0	0.88	6.55	1	0	0
1109.19	0	0	0	0	11.69	0	0	0	0	0	0	0.01	0	0	0	0.01	0	0.81	0	0.91	6.64	1	0	0
1110.63	0	0	0	0	11.6	0	0	0	0	0	0	0	0	0	0	0	0	0.84	0	0.94	6.73	1	0	0
1112.12	0	0	0	0	11.51	0	0	0	0	0	0	0	0	0	0	0	0	0.87	0	0.98	6.83	1	0	0
1113.68	0	0	0	0	11.41	0	0	0	0	0	0	0	0	0	0	0	0	0.9	0	1.02	6.93	1	0	0
1115.29	0	0	0	0	11.31	0	0	0	0	0	0	0	0	0	0	0	0	0.94	0	1.05	7.04	1	0	0
1116.98	0	0	0	0	11.2	0	0	0	0	0	0	0	0	0	0	0	0	0.97	0	1.1	7.15	1	0	0
1118.72	0	0	0	0	11.09	0	0	0	0	0	0	0	0	0	0	0	0	1.01	0	1.14	7.26	1	0	0
1120.54	0	0	0	0	10.97	0	0	0	0	0	0	0	0	0	0	0	0	1.05	0	1.18	7.38	0.99	0	0
1122.43	0	0	0	0	10.85	0	0	0	0	0	0	0	0	0	0	0	0	1.09	0	1.23	7.51	0.99	0	0
1124.39	0	0	0	0	10.73	0	0	0	0	0	0	0	0	0	0	0	0	1.13	0	1.28	7.63	0.99	0	0
1126.44	0	0	0	0	10.59	0	0	0	0	0	0	0	0	0	0	0	0	1.17	0	1.33	7.77	0.99	0	0
1128.56	0	0	0	0	10.46	0	0	0	0	0	0	0	0	0	0	0	0	1.22	0	1.39	7.91	0.98	0	0
1130.77	0	0	0	0	10.31	0	0	0	0	0	0	0	0	0	0	0	0	1.27	0	1.45	8.05	0.98	0	0
1133.06	0	0	0	0	10.16	0	0	0	0	0	0	0	0	0	0	0	0	1.32	0	1.51	8.2	0.97	0	0
1135.45	0	0	0	0	10	0	0	0	0	0	0	0	0	0	0	0	0	1.37	0	1.57	8.36	0.97	0	0
1137.93	0	0	0	0	9.84	0	0	0	0	0	0	0	0	0	0	0	0	1.42	0	1.64	8.52	0.96	0	0
1140.51	0	0	0	0	9.66	0	0	0	0	0	0	0	0	0	0	0	0	1.48	0	1.7	8.68	0.95	0	0
1143.19	0	0	0	0	9.48	0	0	0	0	0	0	0	0	0	0	0	0	1.53	0	1.77	8.85	0.94	0	0
1145.98	0	0	0	0	9.29	0	0	0	0	0	0	0	0	0	0	0	0	1.59	0	1.85	9.02	0.94	0	0
1148.88	0	0	0	0	9.1	0	0	0	0	0	0	0	0	0	0	0	0	1.65	0	1.92	9.2	0.93	0	0
1151.89	0	0	0	0	8.89	0	0	0	0	0	0	0	0	0	0	0	0	1.72	0	2	9.38	0.91	0	0
1155.02	0	0	0	0	8.68	0	0	0	0	0	0	0	0	0	0	0	0	1.78	0	2.08	9.57	0.9	0	0
1158.28	0	0	0	0	8.45	0	0	0	0	0	0	0	0	0	0	0	0	1.84	0	2.16	9.76	0.89	0	0
1161.67	0	0	0	0	8.22	0	0	0	0	0	0	0	0	0	0	0	0	1.91	0	2.24	9.95	0.87	0	0
1165.19	0	0	0	0	7.97	0	0	0	0	0	0	0	0	0	0	0	0	1.97	0	2.33	10.14	0.86	0	0
1168.85	0	0	0	0	7.72	0	0	0	0	0	0	0	0	0	0	0	0	2.03	0	2.41	10.33	0.84	0	0
1172.65	0	0	0	0	7.45	0	0	0	0	0	0	0	0	0	0	0	0	2.1	0	2.49	10.52	0.82	0	0
1176.61	0	0	0	0	7.18	0	0	0	0	0	0	0	0	0	0	0	0	2.16	0	2.58	10.72	0.81	0	0
1180.72	0	0	0	0	6.89	0	0	0	0	0	0	0	0	0	0	0	0	2.21	0	2.66	10.9	0.78	0	0
1185	0	0	0	0	6.6	0	0	0	0	0	0	0	0	0	0	0	0	2.27	0	2.74	11.09	0.76	0	0
1189.44	0	0	0	0	6.29	0	0	0	0	0	0	0	0	0	0	0	0	2.32	0	2.81	11.26	0.74	0	0
1194.07	0	0	0	0	5.98	0	0	0	0	0	0	0	0	0	0	0	0	2.37	0	2.88	11.43	0.72	0	0
1198.87	0	0	0	0	5.66	0	0	0	0	0	0	0	0	0	0	0	0	2.41	0	2.94	11.59	0.69	0	0
1203.87	0	0	0	0	5.33	0	0	0	0	0	0	0	0	0	0	0	0	2.44	0	3	11.74	0.67	0	0
1209.06	0	0	0	0	4.99	0	0	0	0	0	0	0	0	0	0	0	0	2.46	0	3.04	11.88	0.64	0	0
1214.46	0	0	0	0	4.65	0	0	0	0	0	0	0	0	0	0	0	0	2.48	0	3.08	12	0.61	0	0
1220.08	0	0	0	0	4.31	0	0	0	0	0	0	0	0	0	0	0	0	2.49	0	3.11	12.1	0.58	0	0
1225.91	0	0	0	0	3.97	0	0	0	0	0	0	0	0	0	0	0	0	2.48	0	3.12	12.18	0.55	0	0
1231.98	0	0	0	0	3.62	0	0	0	0	0	0	0	0	0	0	0	0	2.46	0	3.12	12.24	0.52	0	0
1238.29	0	0	0	0	3.28	0	0	0	0	0	0	0	0	0	0	0	0	2.44	0	3.1	12.27	0.5	0	0
1244.85	0	0	0	0	2.95	0	0	0	0	0	0	0	0	0	0	0	0	2.4	0	3.07	12.28	0.47	0	0
1251.67	0	0	0	0	2.63	0	0	0	0	0	0	0	0	0	0	0	0	2.34	0	3.02	12.27	0.44	0	0
1258.76	0	0	0	0	2.32	0	0	0	0	0	0	0	0	0	0	0	0	2.28	0	2.96	12.22	0.41	0	0
1266.13	0	0	0	0	2.02	0	0	0	0	0	0	0	0	0	0	0	0	2.2	0	2.88	12.15	0.38	0	0
1273.8	0	0	0	0	1.74	0	0	0	0	0	0	0	0	0	0	0	0	2.12	0	2.79	12.06	0.35	0	0
1281.76	0	0	0	0	1.47	0	0	0	0	0	0	0	0	0	0	0	0	2.02	0	2.69	11.93	0.33	0	0
1290.05	0	0	0	0	1.23	0	0	0	0	0	0	0	0	0	0	0	0	1.92	0	2.58	11.79	0.3	0	0
1298.66	0	0	0	0	1.01	0	0	0	0	0	0	0	0	0	0	0	0	1.82	0	2.47	11.61	0.28	0	0
1307.61	0	0	0	0	0.82	0	0	0	0	0	0	0	0	0	0	0	0	1.72	0	2.35	11.43	0.25	0	0
1316.92	0	0	0	0	0.64	0	0	0	0	0	0	0	0	0	0	0	0	1.62	0	2.23	11.22	0.23	0	0
1326.6	0	0	0	0	0.49	0	0	0	0	0	0	0	0	0	0	0	0	1.52	0	2.12	11	0.21	0	0
1336.66	0	0	0	0	0.37	0	0	0	0	0	0	0	0	0	0	0	0	1.43	0	2.02	10.77	0.2	0	0
1347.12	0	0	0	0	0.26	0	0	0	0	0	0	0	0	0	0	0	0	1.35	0	1.93	10.54	0.18	0	0
1358	0	0.01	0	0	0.18	0	0	0	0	0	0	0	0	0	0	0	0	1.28	0	1.85	10.3	0.16	0	0
1369.31	0	0.04	0	0	0.12	0	0	0	0	0	0	0	0	0	0	0	0	1.22	0	1.78	10.07	0.15	0	0
1381.06	0	0.13	0	0	0.07	0	0	0	0	0	0	0	0	0	0	0	0	1.17	0	1.73	9.84	0.14	0	0
1393.28	0	0.28	0	0	0.04	0	0	0	0	0	0	0	0	0	0	0	0	1.13	0	1.69	9.63	0.13	0	0
1405.99	0	0.38	0	0	0.02	0	0	0	0	0	0	0	0	0	0	0	0	1.1	0	1.67	9.41	0.12	0	0
1419.2	0	0.34	0	0	0.01	0	0	0	0	0	0	0	0	0	0	0	0	1.07	0	1.66	9.21	0.11	0	0
1432.94	0	0.21	0	0	0	0	0	0	0	0	0	0	0	0	0	0	0	1.05	0	1.65	9.03	0.11	0	0
1447.22	0	0.1	0	0	0	0	0	0	0	0	0	0	0	0	0	0	0	1.04	0	1.66	8.85	0.1	0	0
1462.06	0	0.03	0	0	0	0	0	0	0	0	0	0	0	0	0	0	0	1.03	0	1.67	8.68	0.1	0	0
1477.5	0	0.01	0	0	0	0	0	0	0	0	0	0	0	0	0	0	0	1.03	0	1.69	8.52	0.09	0	0
1493.54	0	0	0	0	0	0	0	0	0	0	0	0	0	0	0	0	0	1.02	0	1.71	8.37	0.09	0	0
1510.22	0	0	0	0	0	0	0	0	0	0	0	0	0	0	0	0	0	1.02	0	1.74	8.22	0.09	0	0
1527.57	0	0	0	0	0	0	0	0	0	0	0	0	0	0	0	0	0	1.01	0	1.76	8.08	0.09	0	0
1545.6	0	0	0	0	0	0	0	0	0	0	0	0	0	0	0	0	0	1	0	1.79	7.93	0.08	0	0
1564.35	0	0	0	0	0	0	0	0	0	0	0	0	0	0	0	0	0	1	0	1.82	7.79	0.08	0	0
1583.84	0	0	0	0	0	0	0	0	0	0	0	0	0	0	0	0	0	0.99	0	1.85	7.65	0.08	0	0
1604.11	0	0	0	0	0	0	0	0	0	0	0	0	0	0	0	0	0	0.98	0	1.88	7.5	0.08	0	0
1625.17	0	0	0	0	0	0	0	0	0	0	0	0	0	0	0	0	0	0.97	0	1.91	7.35	0.08	0	0
1647.08	0	0	0	0	0	0	0	0	0	0	0	0	0	0	0	0	0	0.96	0	1.94	7.18	0.08	0	0
1669.85	0	0	0	0	0	0	0	0	0	0	0	0	0	0	0	0	0	0.95	0	1.97	7.01	0.08	0	0
1693.52	0	0	0	0	0	0	0	0	0	0	0	0	0	0	0	0	0	0.94	0	2	6.82	0.08	0	0
1718.14	0	0	0	0	0	0	0	0	0	0	0	0	0	0	0	0	0	0.92	0	2.03	6.62	0.07	0	0
1743.73	0	0	0	0	0	0	0	0	0	0	0	0	0	0	0	0	0	0.91	0	2.06	6.4	0.07	0	0
1770.34	0	0	0	0	0	0	0	0	0	0	0	0	0	0	0	0	0	0.89	0	2.08	6.16	0.07	0	0
1798	0	0	0	0	0	0	0	0	0	0	0	0	0	0	0	0	0	0.87	0	2.11	5.9	0.07	0	0
1826.75	0	0	0	0	0	0	0	0	0	0	0	0	0	0	0	0	0	0.84	0	2.12	5.61	0.07	0	0
1856.65	0	0	0	0	0	0	0	0	0	0	0	0	0	0	0	0	0	0.81	0	2.11	5.3	0.06	0	0
1887.74	0	0	0	0	0	0	0	0	0	0	0	0	0	0	0	0	0	0.76	0	2.09	4.95	0.06	0	0
1920.05	0	0	0	0	0	0	0	0	0	0	0	0	0	0	0	0	0	0.71	0	2.03	4.58	0.06	0	0
1953.65	0	0	0	0	0	0	0	0	0	0	0	0	0	0	0	0	0	0.65	0	1.93	4.18	0.05	0	0
1988.58	0	0	0	0	0	0	0	0	0	0	0	0	0	0	0	0	0	0.57	0	1.79	3.76	0.04	0	0
2024.9	0	0	0	0	0	0	0	0	0	0	0	0	0	0	0	0	0	0.49	0	1.61	3.33	0.04	0	0
2062.66	0	0	0	0	0	0	0	0	0	0	0	0	0	0	0	0	0	0.4	0	1.39	2.9	0.03	0	0
2101.91	0	0	0	0	0	0	0	0	0	0	0	0	0	0	0	0	0	0.31	0	1.15	2.48	0.02	0	0
2142.72	0	0	0	0	0	0	0	0	0	0	0	0.01	0	0	0	0	0	0.23	0	0.9	2.08	0.02	0	0
2185.15	0	0	0	0	0	0	0	0	0	0	0	0.01	0	0	0	0	0	0.16	0	0.67	1.72	0.01	0	0
2229.27	0	0	0	0	0	0	0	0	0	0	0	0.01	0	0	0	0	0	0.11	0	0.47	1.4	0.01	0	0
2275.13	0	0	0	0	0	0	0	0	0	0	0	0.01	0	0	0	0	0	0.07	0	0.31	1.13	0.01	0	0
2322.81	0	0	0	0	0	0	0	0	0	0	0	0.01	0	0	0	0	0	0.04	0	0.19	0.9	0	0	0
2372.38	0	0	0	0	0	0	0	0	0	0	0	0.01	0	0	0	0	0	0.02	0	0.11	0.71	0	0	0
2423.92	0	0	0	0	0	0	0	0	0	0	0	0.01	0	0	0	0	0.01	0.01	0	0.06	0.57	0	0	0
2477.06	0	0	0	0	0	0	0	0	0	0	0	0.01	0	0	0	0	0.01	0	0	0.03	0.45	0	0	0
2530.8	0	0	0	0	0	0	0	0	0	0	0	0.02	0.01	0	0	0.01	0.01	0	0	0.02	0.37	0	0	0
2584.54	0	0	0	0	0	0	0	0	0	0	0	0.02	0.01	0	0	0.01	0.01	0	0	0.01	0.3	0	0	0
2638.28	0	0	0	0	0	0	0	0	0	0	0	0.02	0.01	0	0	0.01	0.02	0	0	0	0.25	0	0	0
2692.02	0	0	0	0	0	0	0	0	0	0	0	0.02	0.02	0	0	0.01	0.02	0	0	0	0.22	0	0	0
2745.76	0	0	0	0	0	0	0	0	0	0	0	0.02	0.03	0	0	0.01	0.03	0	0	0	0.19	0	0	0
2799.5	0	0	0	0	0	0	0	0	0	0	0	0.02	0.03	0	0	0.01	0.04	0	0	0	0.17	0	0	0
2853.24	0	0	0	0	0	0	0	0	0	0	0	0.03	0.04	0	0	0.01	0.05	0	0	0	0.15	0	0	0
2906.98	0	0	0	0	0	0	0	0	0	0	0	0.03	0.05	0	0.01	0.01	0.06	0	0	0	0.14	0	0	0
2960.72	0	0	0	0	0	0	0	0	0	0	0	0.04	0.05	0	0.01	0.01	0.07	0	0	0	0.14	0	0	0
3014.46	0	0	0	0	0	0	0	0	0	0	0	0.05	0.06	0	0.01	0.01	0.08	0	0	0	0.14	0	0	0
3068.2	0	0	0	0	0	0	0	0	0	0	0	0.06	0.07	0	0.01	0.01	0.09	0	0	0	0.14	0	0	0
3121.94	0	0	0	0	0	0	0	0	0	0	0	0.07	0.08	0	0.01	0.01	0.1	0	0	0	0.14	0	0	0
3175.68	0	0	0	0	0	0	0	0	0	0	0	0.08	0.08	0	0.02	0.01	0.11	0	0	0	0.14	0	0	0
3229.42	0	0	0	0	0	0	0	0	0	0	0	0.09	0.09	0	0.02	0.01	0.12	0	0	0	0.15	0	0	0
3283.15	0	0	0	0	0	0	0	0	0	0	0	0.1	0.09	0	0.02	0.01	0.12	0	0	0	0.15	0	0	0
3336.89	0	0	0	0	0	0	0	0	0	0	0	0.11	0.09	0	0.03	0.01	0.13	0	0	0	0.16	0	0	0
3390.63	0	0	0	0	0	0	0	0	0	0	0	0.12	0.09	0	0.03	0.01	0.13	0	0	0	0.16	0	0	0
3444.37	0	0	0	0	0	0	0	0	0	0	0	0.13	0.08	0	0.03	0.01	0.12	0	0	0	0.16	0	0	0
3498.11	0	0	0	0	0	0	0	0	0	0	0	0.13	0.08	0	0.03	0.01	0.12	0	0	0.01	0.16	0	0	0
3551.84	0	0	0	0	0	0	0	0	0	0	0	0.13	0.07	0	0.03	0.01	0.11	0	0	0.01	0.16	0	0	0
3605.58	0	0	0	0	0	0	0	0	0	0	0	0.13	0.07	0	0.03	0.01	0.1	0	0	0.01	0.16	0	0	0
3658.82	0	0	0	0	0	0	0	0	0	0	0	0.13	0.06	0	0.03	0	0.09	0	0	0.01	0.16	0	0	0
3710.58	0	0	0	0	0	0	0	0	0	0	0	0.12	0.05	0	0.03	0	0.09	0	0	0.01	0.15	0	0	0
3760.37	0	0	0	0	0	0	0	0	0	0	0	0.12	0.04	0	0.03	0	0.08	0	0	0.01	0.14	0	0	0
3808.28	0	0	0	0	0	0	0	0	0	0	0	0.11	0.04	0	0.03	0	0.07	0	0	0.01	0.14	0	0	0
3854.38	0	0	0	0	0	0	0	0	0	0	0	0.11	0.03	0	0.03	0	0.06	0	0	0.01	0.13	0	0	0
3898.74	0	0	0	0	0	0	0	0	0	0	0	0.1	0.03	0	0.02	0	0.05	0	0	0.01	0.12	0	0	0
3941.42	0	0	0	0	0	0	0	0	0	0	0	0.09	0.02	0	0.02	0	0.05	0	0	0.01	0.11	0	0	0
3982.48	0	0	0	0	0	0	0	0	0	0	0	0.09	0.02	0	0.02	0	0.04	0	0	0.01	0.11	0	0	0
4021.99	0	0	0	0	0	0	0	0	0	0	0	0.08	0.02	0	0.02	0	0.04	0	0	0.01	0.1	0	0	0
4060.01	0	0	0	0	0	0	0	0	0	0	0	0.07	0.01	0	0.02	0	0.03	0	0	0.01	0.09	0	0	0
4096.59	0	0	0	0	0	0	0	0	0	0	0	0.07	0.01	0	0.02	0	0.03	0	0	0.01	0.09	0	0	0
4131.79	0	0	0	0	0	0	0	0	0	0	0	0.06	0.01	0	0.02	0	0.03	0	0	0.01	0.08	0	0	0
4165.65	0	0	0	0	0	0	0	0	0	0	0	0.06	0.01	0	0.01	0	0.02	0	0	0.01	0.07	0	0	0
4198.24	0	0	0	0	0	0	0	0	0	0	0	0.05	0.01	0	0.01	0	0.02	0	0	0.01	0.07	0	0	0
4229.59	0	0	0	0	0	0	0	0	0	0	0	0.05	0.01	0	0.01	0	0.02	0	0	0.01	0.06	0	0	0
4259.76	0	0	0	0	0	0	0	0	0	0	0	0.05	0.01	0	0.01	0	0.02	0	0	0.01	0.06	0	0	0
4288.79	0	0	0	0	0	0	0	0	0	0	0	0.04	0	0	0.01	0	0.02	0	0	0.01	0.06	0	0	0
4316.71	0	0	0	0	0	0	0	0	0	0	0	0.04	0	0	0.01	0	0.01	0	0	0.01	0.05	0	0	0
4343.59	0	0	0	0	0	0	0	0	0	0	0	0.04	0	0	0.01	0	0.01	0	0	0.01	0.05	0	0	0
4369.44	0	0	0	0	0	0	0	0	0	0	0	0.03	0	0	0.01	0	0.01	0	0	0.01	0.05	0	0	0
4394.32	0	0	0	0	0	0	0	0	0	0	0	0.03	0	0	0.01	0	0.01	0	0	0.01	0.04	0	0	0
4418.26	0	0	0	0	0	0	0	0	0	0	0	0.03	0	0	0.01	0	0.01	0	0	0.01	0.04	0	0	0
4441.29	0	0	0	0	0	0	0	0	0	0	0	0.03	0	0	0.01	0	0.01	0	0	0.01	0.04	0	0	0
4463.46	0	0	0	0	0	0	0	0	0	0	0	0.03	0	0	0.01	0	0.01	0	0	0.01	0.04	0	0	0
4484.78	0	0	0	0	0	0	0	0	0	0	0	0.02	0	0	0.01	0	0.01	0	0	0.01	0.04	0	0	0
4505.3	0	0	0	0	0	0	0	0	0	0	0	0.02	0	0	0.01	0	0.01	0	0	0.01	0.03	0	0	0
4525.04	0	0	0	0	0	0	0	0	0	0	0	0.02	0	0	0.01	0	0.01	0	0	0.01	0.03	0	0	0
4544.03	0	0	0	0	0	0	0	0	0	0	0	0.02	0	0	0.01	0	0.01	0	0	0.01	0.03	0	0	0
4562.31	0	0	0	0	0	0	0	0	0	0	0	0.02	0	0	0.01	0	0.01	0	0	0.01	0.03	0	0	0
4579.89	0	0	0	0	0	0	0	0	0	0	0	0.02	0	0	0	0	0.01	0	0	0.01	0.03	0	0	0
4596.82	0	0	0	0	0	0	0	0	0	0	0	0.02	0	0	0	0	0.01	0	0	0.01	0.03	0	0	0
4613.1	0	0	0	0	0	0	0	0	0	0	0	0.02	0	0	0	0	0.01	0	0	0.01	0.03	0	0	0
4628.76	0	0	0	0	0	0	0	0	0	0	0	0.02	0	0	0	0	0.01	0	0	0.01	0.03	0	0	0
4643.83	0	0	0	0	0	0	0	0	0	0	0	0.02	0	0	0	0	0	0	0	0.01	0.02	0	0	0
4658.34	0	0	0	0	0	0	0	0	0	0	0	0.02	0	0	0	0	0	0	0	0.01	0.02	0	0	0
4672.29	0	0	0	0	0	0	0	0	0	0	0	0.02	0	0	0	0	0	0	0	0.01	0.02	0	0	0
4685.72	0	0	0	0	0	0	0	0	0	0	0	0.02	0	0	0	0	0	0	0	0.01	0.02	0	0	0
4698.64	0	0	0	0	0	0	0	0	0	0	0	0.01	0	0	0	0	0	0	0	0.01	0.02	0	0	0
4711.07	0	0	0	0	0	0	0	0	0	0	0	0.01	0	0	0	0	0	0	0	0.01	0.02	0	0	0
4723.03	0	0	0	0	0	0	0	0	0	0	0	0.01	0	0	0	0	0	0	0	0.01	0.02	0	0	0
4734.53	0	0	0	0	0	0	0	0	0	0	0	0.01	0	0	0	0	0	0	0	0.01	0.02	0	0	0
4745.61	0	0	0	0	0	0	0	0	0	0	0	0.01	0	0	0	0	0	0	0	0.01	0.02	0	0	0
4756.26	0	0	0	0	0	0	0	0	0	0	0	0.01	0	0	0	0	0	0	0	0.01	0.02	0	0	0
4766.51	0	0	0	0	0	0	0	0	0	0	0	0.01	0	0	0	0	0	0	0	0.01	0.02	0	0	0
4776.38	0	0	0	0	0	0	0	0	0	0	0	0.01	0	0	0	0	0	0	0	0.01	0.02	0	0	0
4785.87	0	0	0	0	0	0	0	0	0	0	0	0.01	0	0	0	0	0	0	0	0.01	0.02	0	0	0
4795	0	0	0	0	0	0	0	0	0	0	0	0.01	0	0	0	0	0	0	0	0.01	0.02	0	0	0
4803.78	0	0	0	0	0	0	0	0	0	0	0	0.01	0	0	0	0	0	0	0	0.01	0.02	0	0	0
4812.24	0	0	0	0	0	0	0	0	0	0	0	0.01	0	0	0	0	0	0	0	0.01	0.02	0	0	0
4820.37	0	0	0	0	0	0	0	0	0	0	0	0.01	0	0	0	0	0	0	0	0.01	0.02	0	0	0
4828.2	0	0	0	0	0	0	0	0	0	0	0	0.01	0	0	0	0	0	0	0	0.01	0.02	0	0	0
4835.73	0	0	0	0	0	0	0	0	0	0	0	0.01	0	0	0	0	0	0	0	0.01	0.02	0	0	0
4842.98	0	0	0	0	0	0	0	0	0	0	0	0.01	0	0	0	0	0	0	0	0.01	0.02	0	0	0
4849.95	0	0	0	0	0	0	0	0	0	0	0	0.01	0	0	0	0	0	0	0	0.01	0.02	0	0	0
4856.66	0	0	0	0	0	0	0	0	0	0	0	0.01	0	0	0	0	0	0	0	0.01	0.02	0	0	0
4863.11	0	0	0	0	0	0	0	0	0	0	0	0.01	0	0	0	0	0	0	0	0.01	0.02	0	0	0
4869.32	0	0	0	0	0	0	0	0	0	0	0	0.01	0	0	0	0	0	0	0	0.01	0.02	0	0	0
4875.3	0	0	0	0	0	0	0	0	0	0	0	0.01	0	0	0	0	0	0	0	0.01	0.02	0	0	0
4881.05	0	0	0	0	0	0	0	0	0	0	0	0.01	0	0	0	0	0	0	0	0.01	0.02	0	0	0
4886.58	0	0	0	0	0	0	0	0	0	0	0	0.01	0	0	0	0	0	0	0	0.01	0.02	0	0	0
4891.9	0	0	0	0	0	0	0	0	0	0	0	0.01	0	0	0	0	0	0	0	0.01	0.02	0	0	0
4897.03	0	0	0	0	0	0	0	0	0	0	0	0.01	0	0	0	0	0	0	0	0.01	0.02	0	0	0
4901.95	0	0	0	0	0	0	0	0	0	0	0	0.01	0	0	0	0	0	0	0	0.01	0.02	0	0	0
4906.7	0	0	0	0	0	0	0	0	0	0	0	0.01	0	0	0	0	0	0	0	0.01	0.02	0	0	0
4911.26	0	0	0	0	0	0	0	0	0	0	0	0.01	0	0	0	0	0	0	0	0.01	0.02	0	0	0
4915.65	0	0	0	0	0	0	0	0	0	0	0	0.01	0	0	0	0	0	0	0	0.01	0.02	0	0	0
4919.87	0	0	0	0	0	0	0	0	0	0	0	0.01	0	0	0	0	0	0	0	0.01	0.02	0	0	0
4923.94	0	0	0	0	0	0	0	0	0	0	0	0.01	0	0	0	0	0	0	0	0.01	0.02	0	0	0
4927.85	0	0	0	0	0	0	0	0	0	0	0	0.01	0	0	0	0	0	0	0	0.01	0.02	0	0	0
4931.61	0	0	0	0	0	0	0	0	0	0	0	0.01	0	0	0	0	0	0	0	0.01	0.02	0	0	0
4935.23	0	0	0	0	0	0	0	0	0	0	0	0.01	0	0	0	0	0	0	0	0.01	0.02	0	0	0
4938.71	0	0	0	0	0	0	0	0	0	0	0	0.01	0	0	0	0	0	0	0	0.01	0.02	0	0	0
4942.06	0	0	0	0	0	0	0	0	0	0	0	0.01	0	0	0	0	0	0	0	0.01	0.02	0	0	0
4945.29	0	0	0	0	0	0	0	0	0	0	0	0.01	0	0	0	0	0	0	0	0.01	0.02	0	0	0
4948.39	0	0	0	0	0	0	0	0	0	0	0	0.01	0	0	0	0	0	0	0	0.01	0.02	0	0	0
4951.38	0	0	0	0	0	0	0	0	0	0	0	0.01	0	0	0	0	0	0	0	0.01	0.02	0	0	0
4954.25	0	0	0	0	0	0	0	0	0	0	0	0.01	0	0	0	0	0	0	0	0.01	0.02	0	0	0
4957.01	0	0	0	0	0	0	0	0	0	0	0	0.01	0	0	0	0	0	0	0	0.01	0.02	0	0	0
4959.67	0	0	0	0	0	0	0	0	0	0	0	0.01	0	0	0	0	0	0	0	0.01	0.02	0	0	0
4962.23	0	0	0	0	0	0	0	0	0	0	0	0.01	0	0	0	0	0	0	0	0.01	0.02	0	0	0
4964.7	0	0	0	0	0	0	0	0	0	0	0	0.01	0	0	0	0	0	0	0	0.01	0.02	0	0	0
4967.06	0	0	0	0	0	0	0	0	0	0	0	0.01	0	0	0	0	0	0	0	0.01	0.02	0	0	0
4969.34	0	0	0	0	0	0	0	0	0	0	0	0.01	0	0	0	0	0	0	0	0.01	0.02	0	0	0
4971.54	0	0	0	0	0	0	0	0	0	0	0	0.01	0	0	0	0	0	0	0	0.01	0.02	0	0	0
4973.65	0	0	0	0	0	0	0	0	0	0	0	0.01	0	0	0	0	0	0	0	0.01	0.02	0	0	0
4975.68	0	0	0	0	0	0	0	0	0	0	0	0.01	0	0	0	0	0	0	0	0.01	0.02	0	0	0
4977.63	0	0	0	0	0	0	0	0	0	0	0	0.01	0	0	0	0	0	0	0	0.01	0.02	0	0	0
4979.51	0	0	0	0	0	0	0	0	0	0	0	0.01	0	0	0	0	0	0	0	0.01	0.02	0	0	0
4981.32	0	0	0	0	0	0	0	0	0	0	0	0.01	0	0	0	0	0	0	0	0.01	0.02	0	0	0
4983.06	0	0	0	0	0	0	0	0	0	0	0	0.01	0	0	0	0	0	0	0	0.01	0.02	0	0	0
4984.74	0	0	0	0	0	0	0	0	0	0	0	0.01	0	0	0	0	0	0	0	0.01	0.02	0	0	0
4986.35	0	0	0	0	0	0	0	0	0	0	0	0.01	0	0	0	0	0	0	0	0.01	0.02	0	0	0
4987.9	0	0	0	0	0	0	0	0	0	0	0	0.01	0	0	0	0	0	0	0	0.01	0.02	0	0	0
4989.39	0	0	0	0	0	0	0	0	0	0	0	0.01	0	0	0	0	0	0	0	0.01	0.02	0	0	0
4990.83	0	0	0	0	0	0	0	0	0	0	0	0.01	0	0	0	0	0	0	0	0.01	0.02	0	0	0
4992.21	0	0	0	0	0	0	0	0	0	0	0	0.01	0	0	0	0	0	0	0	0.01	0.02	0	0	0
4993.54	0	0	0	0	0	0	0	0	0	0	0	0.01	0	0	0	0	0	0	0	0.01	0.02	0	0	0
4994.81	0	0	0	0	0	0	0	0	0	0	0	0.01	0	0	0	0	0	0	0	0.01	0.02	0	0	0
4996.04	0	0	0	0	0	0	0	0	0	0	0	0.01	0	0	0	0	0	0	0	0.01	0.02	0	0	0
4997.23	0	0	0	0	0	0	0	0	0	0	0	0.01	0	0	0	0	0	0	0	0.01	0.02	0	0	0
4998.37	0	0	0	0	0	0	0	0	0	0	0	0.01	0	0	0	0	0	0	0	0.01	0.02	0	0	0
4999.46	0	0	0	0	0	0	0	0	0	0	0	0.01	0	0	0	0	0	0	0	0.01	0.02	0	0	0
